# Supplementary material for: Assessment of Jugular Venous Blood Flow Stasis and Thrombosis During Spaceflight
Source: PubMed Central journal article supplement (PMC6902784; doi:10.1001/jamanetworkopen.2019.15011), 2019-11-13

## Supplementary Online Content

Marshall-Goebel K, Laurie SS, Alferova IV, et al. Assessment of jugular venous blood flow stasis and thrombosis during spaceflight. *JAMA Netw Open*. 2019;2(11):e1915011. doi:10.1001/jamanetworkopen.2019.15011

**eFigure 1.** Doppler Ultrasonographic Tracing of the Internal Jugular Vein With Stagnant Blood Flow

**eFigure 2.** Doppler Ultrasonographic Tracing of the Internal Jugular Vein With Reverse Blood Flow

This supplementary material has been provided by the authors to give readers additional information about their work.

**eFigure 1.** Doppler Ultrasonographic Tracing of the Internal Jugular Vein With Stagnant Blood Flow

Legend: With the sample volume taken in the internal jugular vein lumen (A), the resulting Doppler tracing of blood flow in the internal jugular vein (B) during spaceflight shows predominately stagnant flow (grade 3), with no net forward flow towards the heart as would nominally be seen in the vessel on Earth.

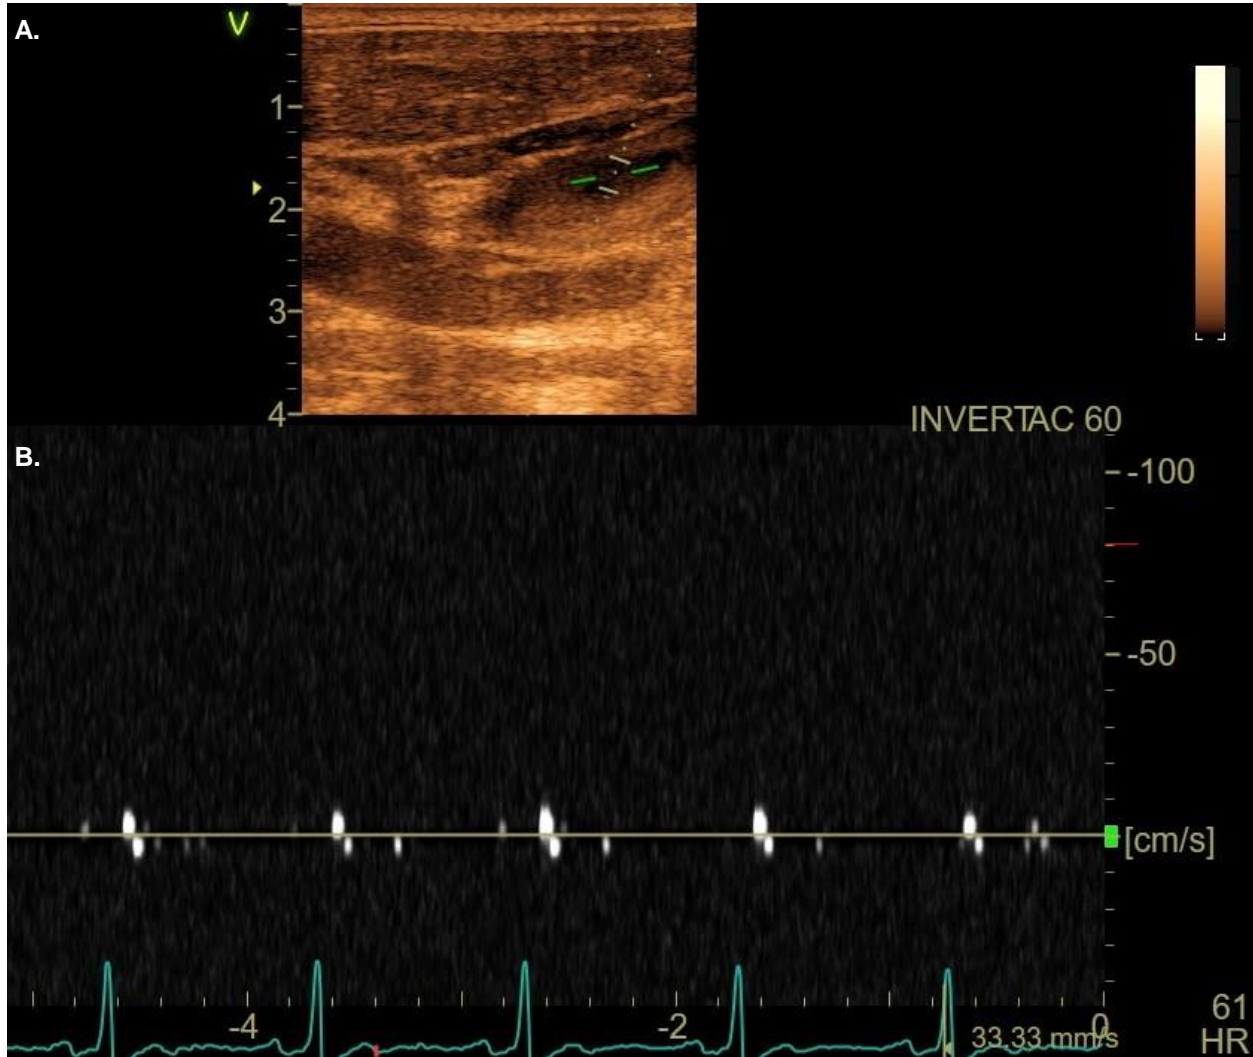

**eFigure 2.** Doppler Ultrasonographic Tracing of the Internal Jugular Vein With Reverse Blood Flow

Legend: With the sample volume taken in the internal jugular vein lumen (A), the resulting Doppler tracing of blood flow in the internal jugular vein (B) during spaceflight shows predominately retrograde flow towards the head (grade 4), the opposite of what would normally be seen on Earth.

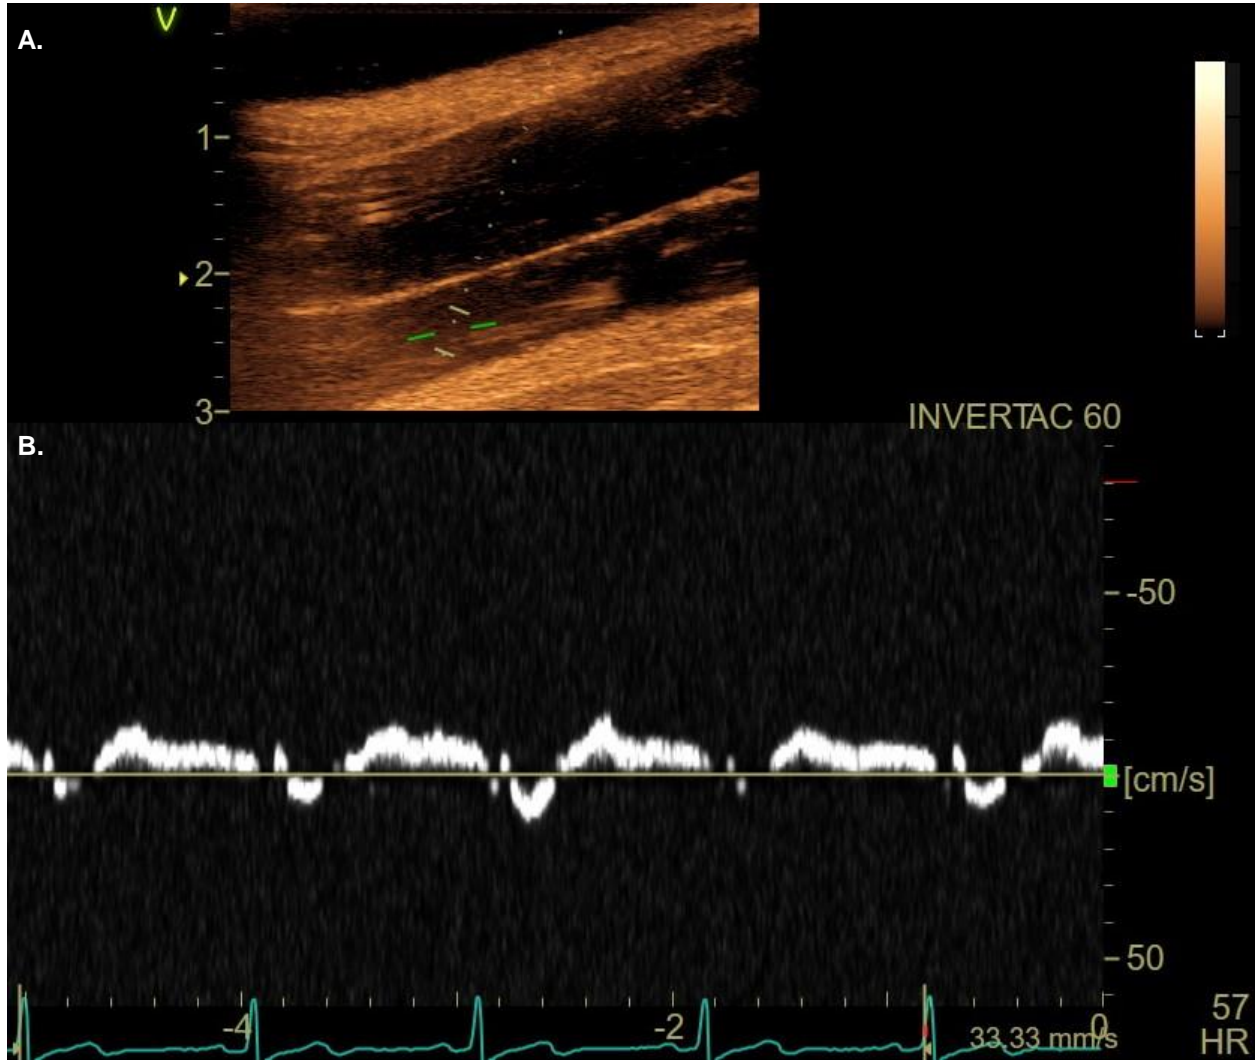

Supplement: jamanetwopen-2-e1915011-s001.pdf [file jamanetwopen-2-e1915011-s001.pdf]
